# Supplementary material for: Genomic diversity and distribution of Bifidobacterium longum subsp. longum across the human lifespan
Source: PubMed Central journal article supplement (PMC5758520; doi:10.1038/s41598-017-18391-x), 2018-01-08

**-Supplementary Information-**

**Genomic diversity and distribution of *Bifidobacterium longum* subsp. *longum*  
across the human lifespan**

Toshitaka Odamaki<sup>1,2\*</sup>, Francesca Bottacini<sup>2</sup>, Kumiko Kato<sup>1</sup>, Eri Mitsuyama<sup>1</sup>, Keisuke  
Yoshida<sup>1</sup>, Ayako Horigome<sup>1</sup>, Jin-zhong Xiao<sup>1</sup> and Douwe van Sinderen<sup>2</sup>

<sup>1</sup>Next Generation Science Institute, Morinaga Milk Industry Co., Ltd., Zama, Kanagawa,  
Japan

<sup>2</sup>APC Microbiome Institute and School of Microbiology, National University of Ireland,  
Western Road, Cork, Ireland

Inventory of Supplementary Information

1. Supplementary Figures and Legends  
Supplementary Figure S1-S5
2. Supplementary Tables  
Supplementary Table S1-S11



Rate of gene family assigned to COG category

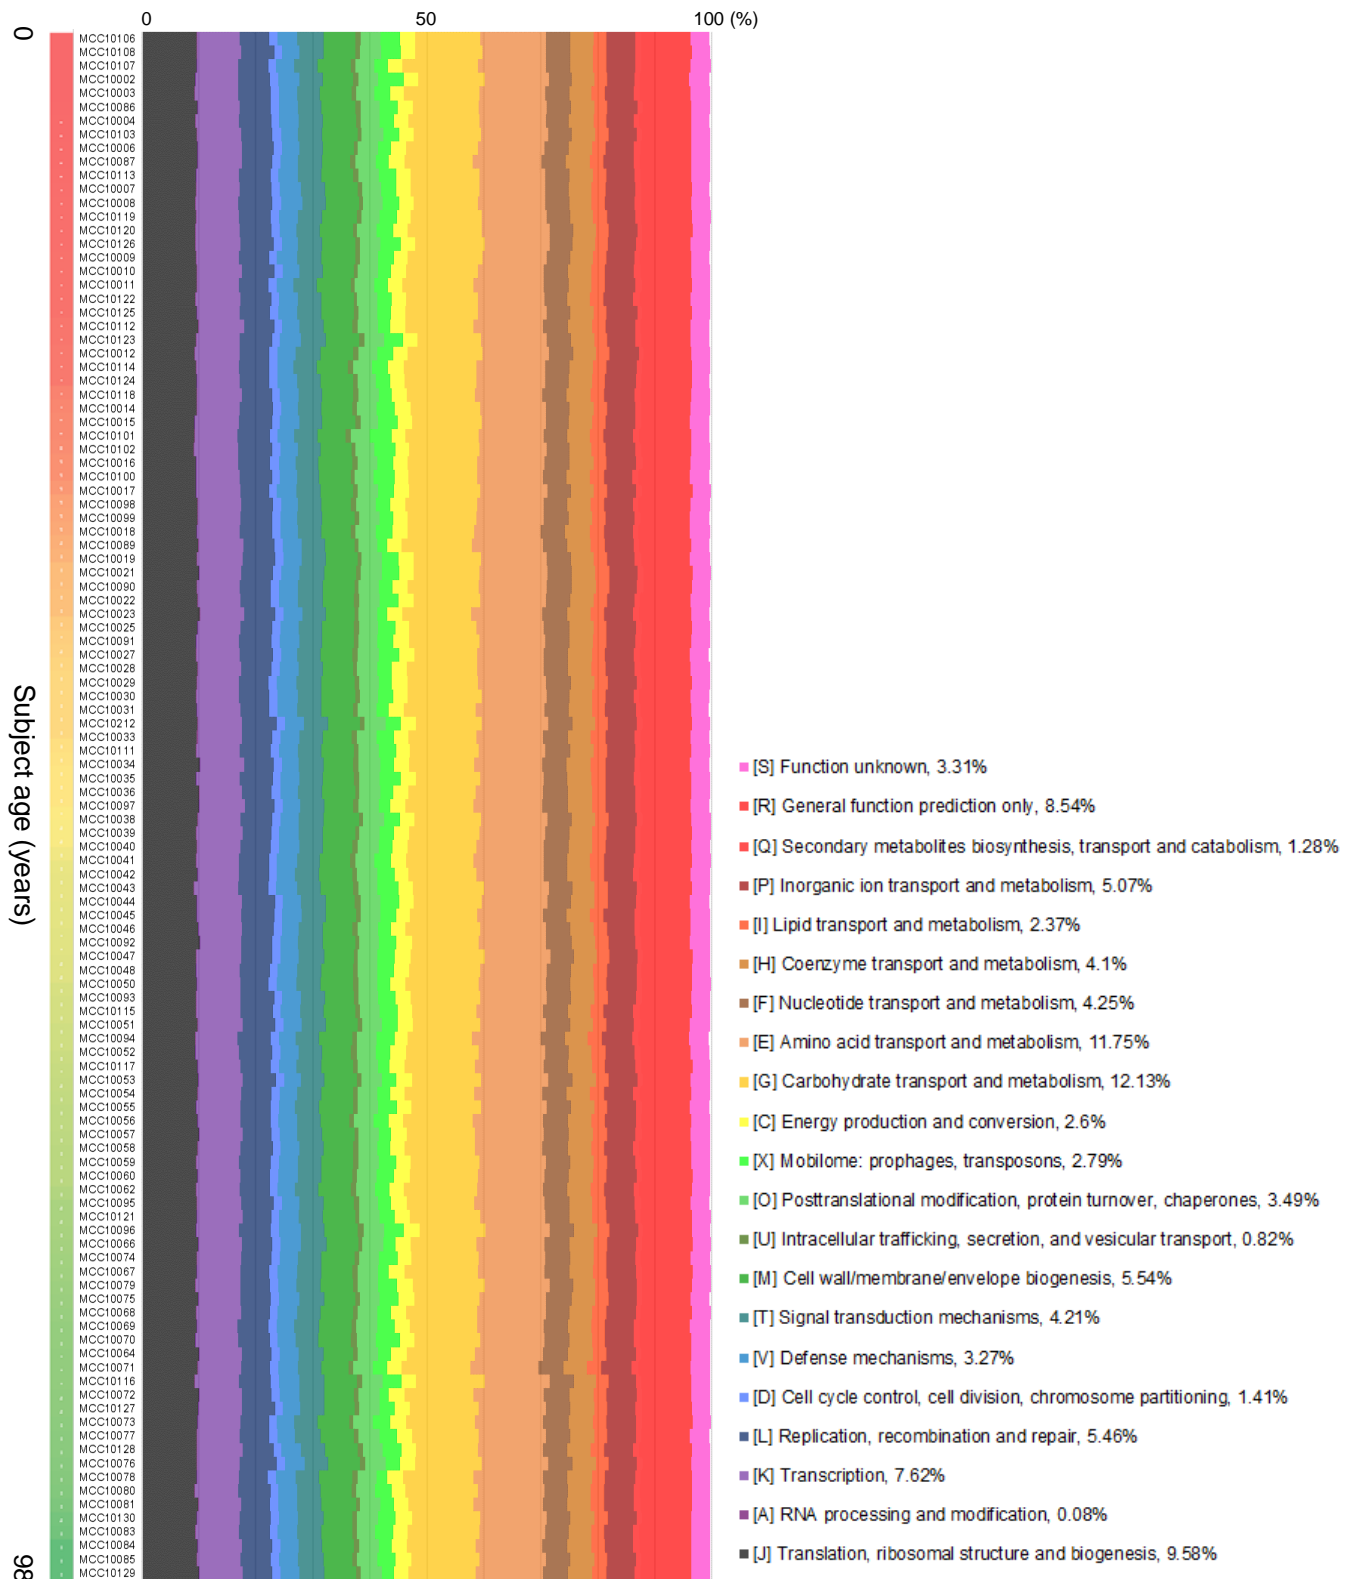

**Supplementary Figure S2**

**Cluster of Orthologue (COG) classification of 113 newly isolated *B. longum* subsp. *longum* strains**

Heatmap showing the COG classification of *B. longum* subsp. *longum* computed ORFs. Strains are sorted by subject age. For each COG entry, the average percentage of hits among *B. longum* subsp. *longum* has been indicated in the legend.

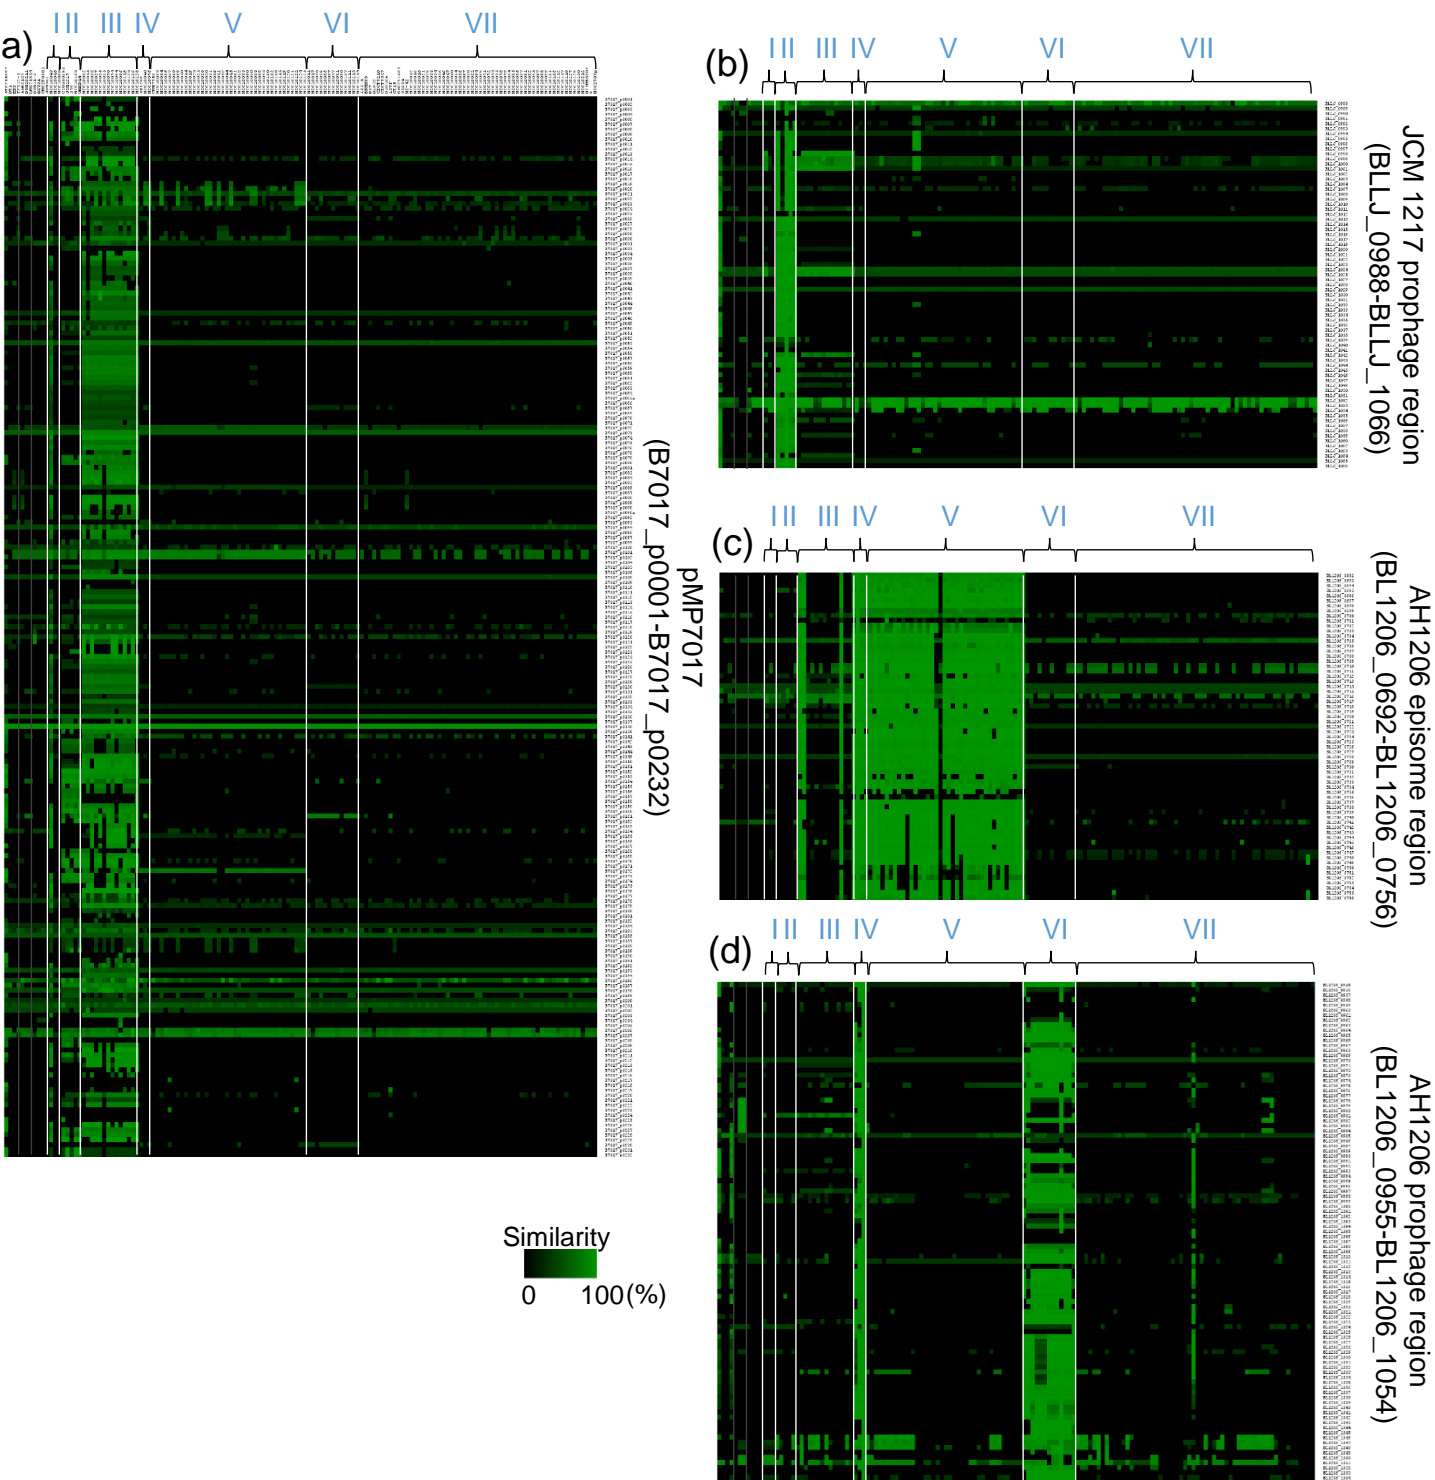

### Supplementary Figure S3

#### Matrix of blastn result against prophage, integrated episome or megaplasmid sequences

Heat map represents the similarity percentage of blastn result of genes belonging to the *B. longum* mobilome. Blue Greece indicates the longum cluster in Figure 2. (a) Megaplasmid pMP7017 homologues detected in 1 and 14 strains belong to longum cluster I and III, respectively. (b) Homologues of *B. longum* subsp. *longum* JCM1217 prophage region (BLLJ\_0988-BLLJ\_1066) found from 5 strains in longum cluster II. (c) Homologues of *B. longum* subsp. *longum* AH1206 episome region (BL1206\_0692-BL1206\_0756) detected in 4, 3 and 37 strains belong longum cluster III, IV and V. (d) Homologues of *B. longum* subsp. *longum* AH1206 prophage region (BL1206\_0955-BL1206\_1054) detected in all strains belonging to longum cluster IV and VI.

(a) Subtype I-E (on the pMP7017 homologue)

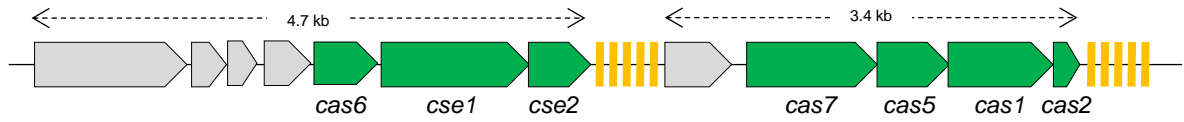

(b) Subtype II-C

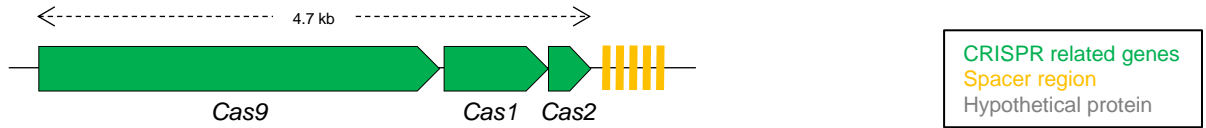

(c) Subtype I-U

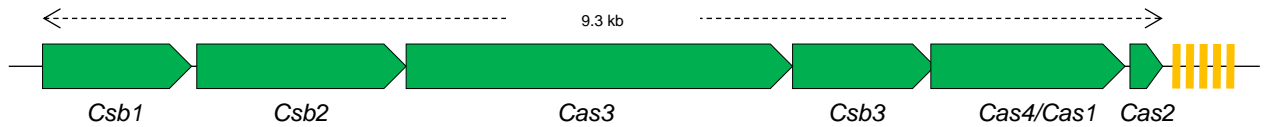

**Supplementary Figure S4**

Subtype of CRISPR-cas system found in this study.

(a) Subtype I-E were located on the predicted megaplasmid sequences in 14 strains. (b) Subtype II-C without *tracrRNA* were located on the chromosome sequences in 39 strains. (c) Subtype I-U was located on the chromosome sequences of MCC10117 strain. Each strain was shown in Supplementary Table S7.

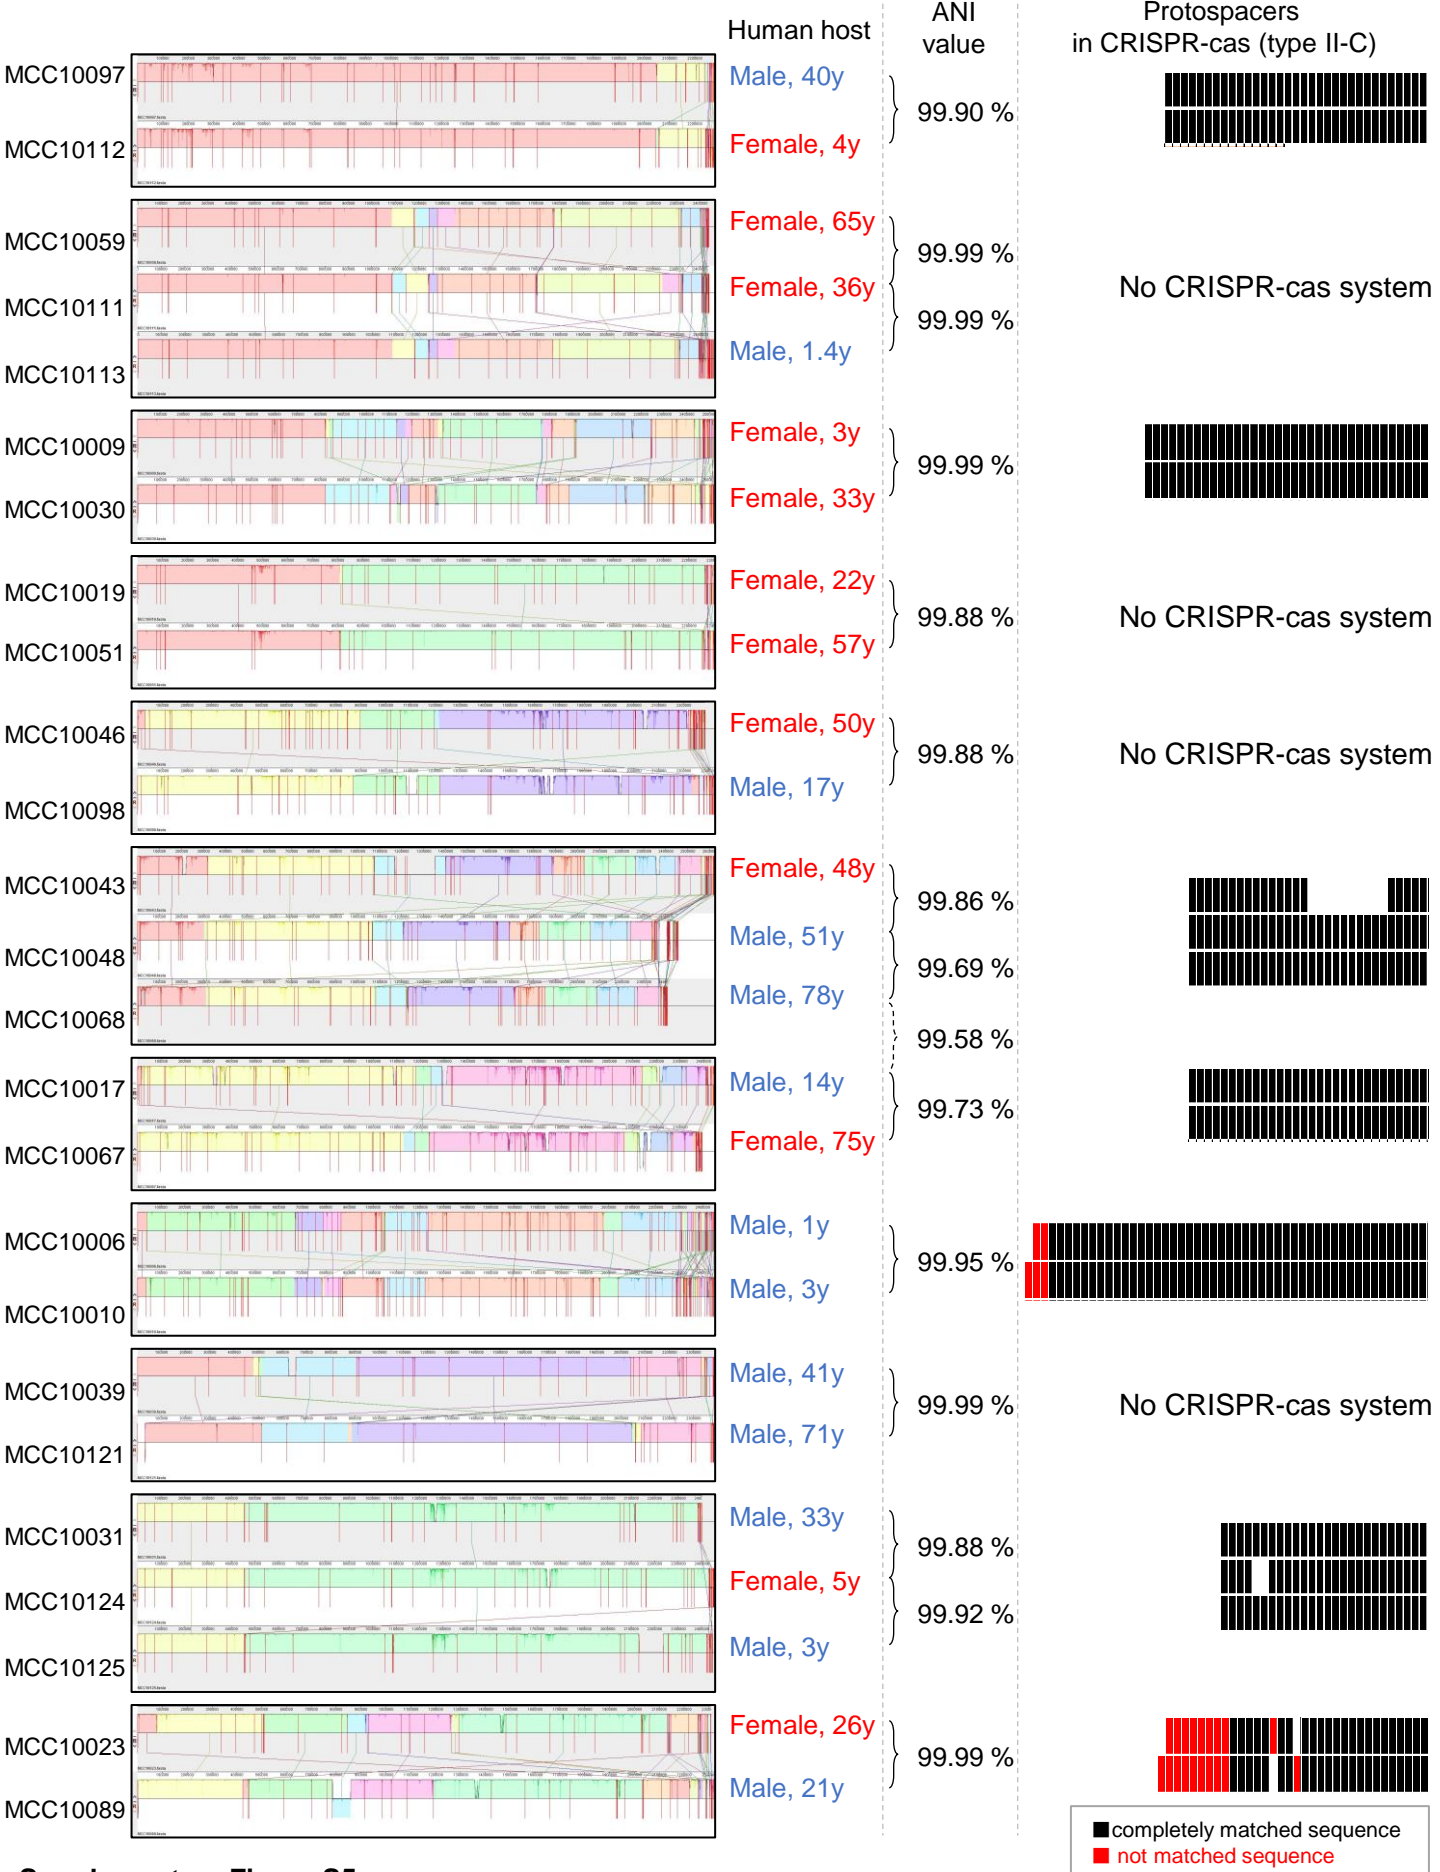

**Supplementary Figure S5**

**Sequence similarity between strains predicted to be transmitted among family members**

Mauve whole nucleotide alignment performed to assess the similarity between transmitted strains. Coloured boxes represent Mauve-deduced linear collinear blocks (LCB), while white gaps represent insertions and deletions. Vertical blocks represent protospacers in CRISPR-cas system, where the black and red colours indicate completely matched or not matched sequence between transmitted strains, respectively.

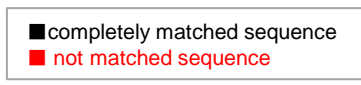

Supplement: 41598_2017_18391_MOESM1_ESM.pdf [file 41598_2017_18391_MOESM1_ESM.pdf]
